# Supplementary material
Source: Springer Nature journal article supplement (https://www.springermedizin.de/resource/supplementary/12984_2008_154_MOESM3_ESM.pdf/9605424)

- YG - CS
- EG - CS
- ▨ YG - FS
- ▨ EG - FS

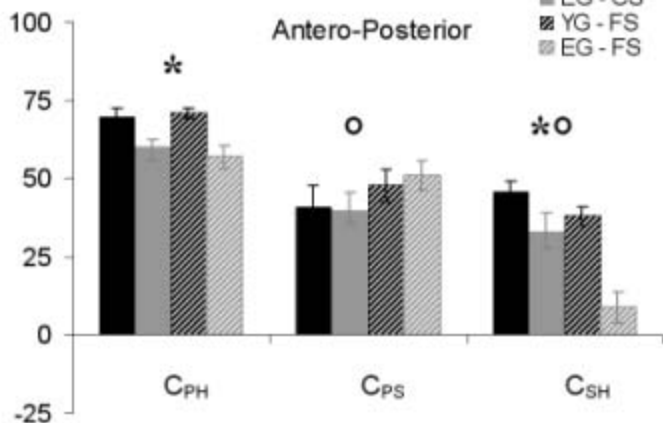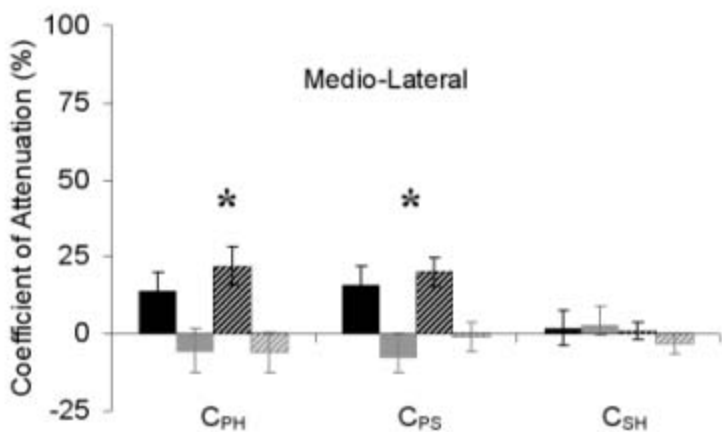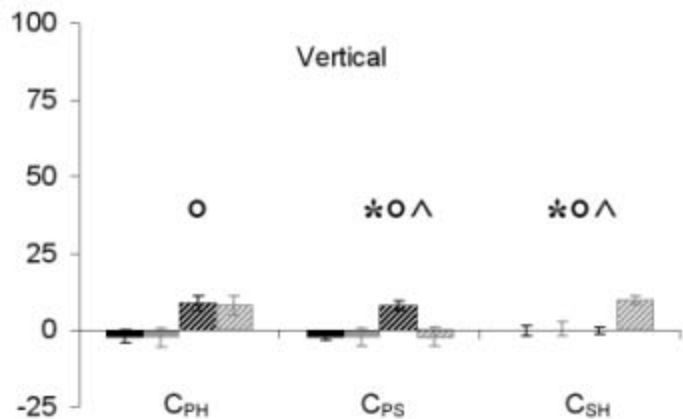

Supplement: MOESM3 [file 9605424]
